# Supplementary material for: Societal Protection and Population Vulnerability: Key Factors in Explaining Community-Level Variation in Fatal Fires Involving Older Adults in Sweden
Source: Springer Nature journal article supplement (doi:10.1007/s10694-020-00997-9), 2020-05-25
Supplement: MOESM1 [file 18011952]

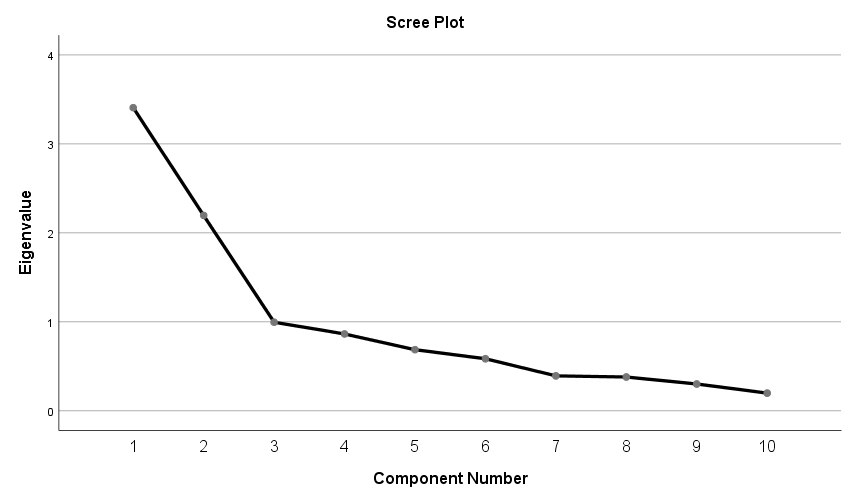


**Figure A1.** Scree plot from the principal components analysis used to determine the number of components to retain. We used the rule of thumb to retain all components above the inflection point (i.e., the bend where the line begins to taper off). In this case, the inflection occurs at component three, which implies that we should retain the first two components.
